# Supplementary material for: Structure and stability of small lithium-chloride LinClm(0,1+) (n ≥ m, n = 1–6, m = 1–3) clusters
Source: Royal Society of Chemistry journal article supplement (doi:10.1039/c7cp04181k), 2017-01-01
Supplement: c7cp04181k1.pdf [file c7cp04181k1.pdf]

# Structure and Stability of Small Lithium-Chloride

## $\text{Li}_n\text{Cl}_m^{(0,+1)}$ ( $n \geq m$ , $n = 1-6$ , $m = 1-3$ ) Clusters

*Milan Milovanović<sup>\*a)</sup>, Suzana Veličković<sup>b)</sup>, Filip Veljković<sup>b)</sup>, Stanka Jerosimić<sup>a)</sup>*

<sup>a)</sup> University of Belgrade, Faculty of Physical Chemistry, Studentski trg 12-16, P.O.Box 47, PAC 105305, 11158 Belgrade, Republic of Serbia

<sup>b)</sup> University of Belgrade - Vinča Institute of Nuclear Sciences P. O. Box 522, 11001 Belgrade, Republic of Serbia

**Table S1.** Bond lengths of  $\text{LiCl}^{(0,+1)}$  (in angstroms) calculated with B3LYP and coupled-cluster methods, in different basis sets.

**Table S2.** Bond lengths ( $C_{2v}$  point group) of  $\text{Li}_2\text{Cl}$  (in angstroms) and the Li-Cl-Li angle (in degrees) calculated with B3LYP and coupled-cluster methods, in different basis sets.

**Table S3.** Geometrical parameters ( $D_{2h}$  point group) of  $\text{Li}_2\text{Cl}_2$ : bond lengths (in angstroms) and angles (in degrees) calculated with B3LYP and coupled-cluster methods in different basis sets.

**Table S4.** The range of heater's temperature and the range of intensities of the most abundant isotope for  $\text{Li}^+$ ,  $\text{Li}_n\text{Cl}^+$  ( $n = 2-6$ ), and  $\text{Li}_n\text{Cl}_{n-1}^+$  ( $n = 3-5$ ).

**Table S5.** Relative energies (that include zero-point vibrational energies  $ZPVE$ ),  $ZPVE$ , and low/imaginary frequencies of the neutral clusters at B3LYP/ cc-pVQZ level.  $\Delta E$  and  $ZPVE$  are in  $\text{kJ mol}^{-1}$ , frequencies in  $\text{cm}^{-1}$ .

**Table S6.** Relative energies (that include zero-point vibrational energies  $ZPVE$ ),  $ZPVE$ , and low/imaginary frequencies of the cationic clusters at B3LYP/ cc-pVQZ level.  $\Delta E$  and  $ZPVE$  are in  $\text{kJ mol}^{-1}$ , frequencies in  $\text{cm}^{-1}$ .

**Table S7.** The occupation numbers of valence  $s$  and  $p$  natural atomic orbitals in the molecular environment for all chlorine and lithium atoms.

**Figure S1.** The charge distribution and the highest occupied NBO for cationic  $\text{Li}_n\text{Cl}_m$  clusters.

**Table S1.** Bond lengths of LiCl<sup>(0,+1)</sup> (in angstroms) calculated with B3LYP and coupled-cluster methods, in different basis sets.

|                   | Basis set / Method | Bond length         |                     |                        |       |          |
|-------------------|--------------------|---------------------|---------------------|------------------------|-------|----------|
|                   |                    | B3LYP               | RCCSD <sup>a)</sup> | RCCSD(T) <sup>a)</sup> | RCCSD | RCCSD(T) |
| LiCl              | cc-pVTZ            | 2.023               | 2.041               | 2.043                  | 2.029 | 2.029    |
|                   | cc-pVQZ            | 2.021               | 2.038               | 2.040                  | 2.021 | 2.021    |
|                   | aug-cc-pVTZ        | 2.024               | 2.046               | 2.049                  | 2.026 | 2.029    |
|                   | aug-cc-pVQZ        | 2.021               | 2.040               | 2.043                  | 2.018 | 2.021    |
|                   | cc-pwCVTZ          | 2.018               | 2.034               | 2.035                  | 2.021 | 2.021    |
|                   | cc-pwCVQZ          | 2.021               | 2.035               | 2.037                  | 2.019 | 2.021    |
|                   | aug-cc-pwCVTZ      | 2.021               | 2.040               | 2.043                  | 2.026 | 2.028    |
|                   | aug-cc-pwCVQZ      | 2.021               | 2.038               | 2.040                  | 2.021 | 2.023    |
|                   | Experimental       | 2.021 <sup>b)</sup> |                     |                        |       |          |
| LiCl <sup>+</sup> | cc-pVTZ            | 2.395               | 2.419               | 2.420                  | 2.397 | 2.398    |
|                   | cc-pVQZ            | 2.382               | 2.412               | 2.414                  | 2.382 | 2.382    |
|                   | aug-cc-pVTZ        | 2.390               | 2.422               | 2.425                  | 2.382 | 2.382    |
|                   | aug-cc-pVQZ        | 2.382               | 2.414               | 2.417                  | 2.367 | 2.368    |
|                   | cc-pwCVTZ          | 2.382               | 2.413               | 2.414                  | 2.392 | 2.392    |
|                   | cc-pwCVQZ          | 2.382               | 2.409               | 2.411                  | 2.382 | 2.382    |
|                   | aug-cc-pwCVTZ      | 2.382               | 2.416               | 2.419                  | 2.394 | 2.396    |
|                   | aug-cc-pwCVQZ      | 2.382               | 2.412               | 2.415                  | 2.382 | 2.383    |

<sup>a)</sup> Coupled cluster methods that include the correlation of only valence electrons.  
<sup>b)</sup> Rounded value from Ref.<sup>75</sup>

**Table S2.** Bond length ( $C_{2v}$  point group) of Li<sub>2</sub>Cl (in angstroms) and the Li-Cl-Li angle (in degrees) calculated with B3LYP and coupled-cluster methods, in different basis sets.

|                    | Basis set / Method | Li-Cl Bond length |                     |                        |       |          |      |
|--------------------|--------------------|-------------------|---------------------|------------------------|-------|----------|------|
|                    |                    | B3LYP             | RCCSD <sup>a)</sup> | RCCSD(T) <sup>a)</sup> | RCCSD | RCCSD(T) |      |
| Li <sub>2</sub> Cl | cc-pVTZ            | 2.178             | 2.198               | 2.199                  | 2.180 | 2.181    |      |
|                    | cc-pVQZ            | 2.173             | 2.192               | 2.194                  | 2.170 | 2.172    |      |
|                    | aug-cc-pVTZ        | 2.177             | 2.201               | 2.204                  | 2.175 | 2.177    |      |
|                    | aug-cc-pVQZ        | 2.174             | 2.194               | 2.196                  | 2.164 | 2.165    |      |
|                    | cc-pwCVTZ          | 2.173             | 2.191               | 2.192                  | 2.176 | 2.177    |      |
|                    | cc-pwCVQZ          | 2.173             | 2.189               | 2.191                  | 2.171 | 2.172    |      |
|                    | aug-cc-pwCVTZ      | 2.174             | 2.195               | 2.198                  | 2.178 | 2.181    |      |
|                    | aug-cc-pwCVQZ      | 2.174             | 2.191               | 2.194                  | 2.173 | 2.174    |      |
|                    |                    |                   | Angle Li-Cl-Li      |                        |       |          |      |
|                    |                    | cc-pVTZ           | 76.1                | 74.7                   | 74.7  | 74.0     | 74.0 |
|                    |                    | cc-pVQZ           | 76.3                | 75.0                   | 75.0  | 73.2     | 73.2 |
|                    |                    | aug-cc-pVTZ       | 76.3                | 74.8                   | 74.8  | 74.2     | 74.3 |
|                    |                    | aug-cc-pVQZ       | 76.3                | 75.0                   | 75.0  | 73.6     | 73.6 |
|                    |                    | cc-pwCVTZ         | 76.3                | 74.8                   | 74.9  | 74.5     | 74.6 |
|                    |                    | cc-pwCVQZ         | 76.4                | 75.0                   | 75.0  | 74.8     | 74.8 |
|                    |                    | aug-cc-pwCVTZ     | 76.2                | 74.9                   | 74.9  | 74.7     | 74.6 |
|                    |                    | aug-cc-pwCVQZ     | 76.4                | 75.0                   | 75.0  | 74.7     | 74.7 |

**Table S3.** Geometrical parameters ( $D_{2h}$  point group) of  $\text{Li}_2\text{Cl}_2$ : bond lengths (in angstroms) and angles (in degrees) calculated with B3LYP and coupled-cluster methods in different basis sets.

|                                  | Bond Li–Cl      | Bond Cl–Cl      | Angle Cl–Li–Cl |
|----------------------------------|-----------------|-----------------|----------------|
| B3LYP/cc-pVTZ                    | 2.202           | 3.592           | 109.3          |
| B3LYP/aug-cc-pVTZ                | 2.201           | 3.587           | 109.2          |
| B3LYP/cc-pVQZ                    | 2.198           | 3.582           | 109.2          |
| RCCSD(T)/cc-pwCVTZ               | 2.194           | 3.564           | 108.6          |
| Experimental <sup>a)</sup>       | $2.23 \pm 0.03$ | $3.61 \pm 0.03$ | $108 \pm 4$    |
| <sup>a)</sup> Ref. <sup>77</sup> |                 |                 |                |

**Table S4.** The range of heater's temperature and the range of intensities of the most abundant isotope for  $\text{Li}^+$ ,  $\text{Li}_n\text{Cl}^+$  ( $n = 2-6$ ), and  $\text{Li}_n\text{Cl}_{n-1}^+$  ( $n = 3-5$ ).

| Ion clusters               | The range of heater's temperature (K) | The range of intensity of cluster ions (a. u.) |
|----------------------------|---------------------------------------|------------------------------------------------|
| $\text{Li}^+$              | 1800 – 2700                           | 400.000 – 1.450.000                            |
| $\text{Li}_2\text{Cl}^+$   | 1837 – 2676                           | 2500 – 192.000                                 |
| $\text{Li}_3\text{Cl}^+$   | 2283 – 2445                           | 1400 – 16000                                   |
| $\text{Li}_4\text{Cl}^+$   | 2157 – 2385                           | 1680 – 16200                                   |
| $\text{Li}_5\text{Cl}^+$   | 2285 – 2445                           | 800 – 14000                                    |
| $\text{Li}_6\text{Cl}^+$   | 1895 – 2155                           | 7000 – 50.000                                  |
| $\text{Li}_3\text{Cl}_2^+$ | 1953 – 2576                           | 2300 – 180.000                                 |
| $\text{Li}_4\text{Cl}_3^+$ | 1953 – 2272                           | 1350 – 6150                                    |
| $\text{Li}_5\text{Cl}_4^+$ | 2184 – 2418                           | 1350 - 5000                                    |

**Table S5.** Relative energies (that include zero-point vibrational energies *ZPVE*), *ZPVE*, and low/imaginary frequencies of the neutral clusters at B3LYP/ cc-pVQZ level.  $\Delta E$  and *ZPVE* are in  $\text{kJ mol}^{-1}$ , frequencies in  $\text{cm}^{-1}$ .

| Species                         | Label                                           | $\Delta E$ | <i>ZPVE</i> | Low / imaginary frequencies |
|---------------------------------|-------------------------------------------------|------------|-------------|-----------------------------|
| LiCl                            | <b>1.1.n.1</b> ( $C_{\infty v}, {}^1\Sigma^+$ ) | 0.0        | 3.84        | /                           |
| Li <sub>2</sub> Cl              | <b>2.1.n.1</b> ( $C_{2v}, {}^2A_1$ )            | 0.0        | 6.89        | /                           |
|                                 | <b>2.1.n.2</b>                                  | 77.3       | 4.52        | /                           |
| Li <sub>3</sub> Cl              | <b>3.1.n.1</b> ( $C_{2v}, {}^1A_1$ )            | 0.0        | 10.71       | /                           |
|                                 | <b>3.1.n.2</b>                                  | 55.0       | 9.27        | /                           |
| Li <sub>4</sub> Cl              | <b>4.1.n.1</b> ( $C_s, {}^2A'$ )                | 0.0        | 12.91       | /                           |
|                                 | <b>4.1.n.2</b>                                  | 12.9       | 12.73       | 26 <i>i</i>                 |
| Li <sub>5</sub> Cl              | <b>5.1.n.1</b> ( $C_{2v}, {}^1A_1$ )            | 0.0        | 16.12       | /                           |
|                                 | <b>5.1.n.2</b>                                  | 16.4       | 16.98       | /                           |
| Li <sub>6</sub> Cl              | <b>6.1.n.1</b> ( $C_s, {}^2A'$ )                | 0.0        | 20.64       | /                           |
|                                 | <b>6.1.n.2</b>                                  | 20.0       | 19.96       | /                           |
|                                 | <b>6.1.n.3</b>                                  | 22.7       | 19.42       | /                           |
| Li <sub>2</sub> Cl <sub>2</sub> | <b>2.2.n.1</b> ( $D_{2h}, {}^1A_g$ )            | 0.0        | 13.18       | /                           |
| Li <sub>3</sub> Cl <sub>2</sub> | <b>3.2.n.1</b> ( $C_{2v}, {}^2A_1$ )            | 0.0        | 15.20       | /                           |
|                                 | <b>3.2.n.2</b>                                  | 12.8       | 14.38       | 37                          |
|                                 | <b>3.2.n.3</b>                                  | 39.3       | 14.50       | /                           |
| Li <sub>4</sub> Cl <sub>2</sub> | <b>4.2.n.1</b> ( $C_{2v}, {}^1A_1$ )            | 0.0        | 18.29       | /                           |
|                                 | <b>4.2.n.2</b>                                  | 24.0       | 18.97       | /                           |
|                                 | <b>4.2.n.3</b>                                  | 26.9       | 19.35       | /                           |
|                                 | <b>4.2.n.4</b>                                  | 37.6       | 18.10       | /                           |
| Li <sub>5</sub> Cl <sub>2</sub> | <b>5.2.n.1</b> ( $C_s, {}^2A'$ )                | 0.0        | 22.82       | /                           |
|                                 | <b>5.2.n.2</b>                                  | 10.2       | 21.34       | 24                          |
|                                 | <b>5.2.n.3</b>                                  | 10.9       | 21.69       | 27                          |
|                                 | <b>5.2.n.4</b>                                  | 11.9       | 21.35       | /                           |
|                                 | <b>5.2.n.5</b>                                  | 12.3       | 20.82       | 45                          |
|                                 | <b>5.2.n.6</b>                                  | 13.2       | 19.66       | 32                          |
|                                 | <b>5.2.n.7</b>                                  | 16.2       | 21.28       | 23, 45                      |
|                                 | <b>5.2.n.8</b>                                  | 18.9       | 21.74       | /                           |
|                                 | <b>5.2.n.9</b>                                  | 19.6       | 19.81       | /                           |
|                                 | <b>5.2.n.10</b>                                 | 29.0       | 19.51       | 18 <i>i</i>                 |
| Li <sub>3</sub> Cl <sub>3</sub> | <b>3.3.n.1</b> ( $D_{3h}, {}^1A_1'$ )           | 0.0        | 20.23       | /                           |
|                                 | <b>3.3.n.2</b>                                  | 52.0       | 20.44       | /                           |
| Li <sub>4</sub> Cl <sub>3</sub> | <b>4.3.n.1</b> ( $C_{3v}, {}^2A_1$ )            | 0.0        | 25.12       | /                           |
|                                 | <b>4.3.n.2</b>                                  | 16.7       | 21.74       | 39                          |
|                                 | <b>4.3.n.3</b>                                  | 28.0       | 22.36       | 24                          |
|                                 | <b>4.3.n.4</b>                                  | 29.3       | 21.32       | 21 <i>i</i>                 |
|                                 | <b>4.3.n.5</b>                                  | 29.8       | 21.99       | 15                          |
|                                 | <b>4.3.n.6</b>                                  | 55.6       | 23.31       | /                           |

**Table S6.** Relative energies (that include zero-point vibrational energies *ZPVE*), *ZPVE*, and low/imaginary frequencies of the cationic clusters at B3LYP/ cc-pVQZ level.  $\Delta E$  and *ZPVE* are in  $\text{kJ mol}^{-1}$ , frequencies in  $\text{cm}^{-1}$ .

| Species                                      | Label                                              | $\Delta E^a$ | <i>ZPVE</i> <sup>a)</sup> | Low / imaginary frequencies |
|----------------------------------------------|----------------------------------------------------|--------------|---------------------------|-----------------------------|
| LiCl <sup>+</sup>                            | <b>1.1.c.1</b> ( $C_{\infty v}$ , $^2\Pi$ )        | 0.0          | 2.00                      | /                           |
| Li <sub>2</sub> Cl <sup>+</sup>              | <b>2.1.c.1</b> ( $D_{\infty h}$ , $^1\Sigma_g^+$ ) | 0.0          | 5.99                      | 48, 48                      |
| Li <sub>3</sub> Cl <sup>+</sup>              | <b>3.1.c.1</b> ( $C_1$ , $^2A$ )                   | 0.0          | 7.21                      | 34                          |
|                                              | <b>3.1.c.2</b>                                     | 29.5         | 9.00                      | /                           |
| Li <sub>4</sub> Cl <sup>+</sup>              | <b>4.1.c.1</b> ( $C_{3v}$ , $^1A_1$ )              | 0.0          | 14.41                     | /                           |
|                                              | <b>4.1.c.2</b>                                     | 7.9          | 10.63                     | 29, 33, 47                  |
|                                              | <b>4.1.c.3</b>                                     | 9.8          | 11.91                     | 35                          |
|                                              | <b>4.1.c.4</b>                                     | 120.9        | 8.12                      | 31, 31                      |
| Li <sub>5</sub> Cl <sup>+</sup>              | <b>5.1.c.1</b> ( $C_s$ , $^2A'$ )                  | 0.0          | 16.66                     | /                           |
|                                              | <b>5.1.c.2</b>                                     | 31.2         | 14.13                     | 34                          |
|                                              | <b>5.1.c.3</b>                                     | 34.4         | 12.44                     | 14, 15, 41                  |
|                                              | <b>5.1.c.4</b>                                     | 43.3         | 12.14                     | 19, 36, 38, 41              |
|                                              | <b>5.1.c.5</b>                                     | 45.3         | 13.18                     | 34, 50                      |
| Li <sub>6</sub> Cl <sup>+</sup>              | <b>6.1.c.1</b> ( $C_s$ , $^1A'$ )                  | 0.0          | 20.75                     | /                           |
|                                              | <b>6.1.c.2</b>                                     | 9.6          | 19.87                     | 47                          |
|                                              | <b>6.1.c.3</b>                                     | 29.2         | 17.80                     | 31, 31                      |
|                                              | <b>6.1.c.4</b>                                     | 40.8         | 15.35                     | 14, 14, 18, 46, 46          |
|                                              | <b>6.1.c.5</b>                                     | 50.7         | 17.58                     | 28                          |
|                                              | <b>6.1.c.6</b>                                     | 67.3         | 15.30                     | 14, 19, 22, 24, 37          |
| Li <sub>2</sub> Cl <sub>2</sub> <sup>+</sup> | <b>2.2.c.1</b> ( $D_{2h}$ , $^2B_{1u}$ )           | 0.0          | 8.90                      | 34                          |
|                                              | <b>2.2.c.2</b>                                     | 48.0         | 7.59                      | 24, 28                      |
| Li <sub>3</sub> Cl <sub>2</sub> <sup>+</sup> | <b>3.2.c.1</b> ( $D_{\infty h}$ , $^1\Sigma_g^+$ ) | 0.0          | 12.00                     | 20, 21, 30, 30              |
|                                              | <b>3.2.c.2</b>                                     | 9.2          | 16.85                     | /                           |
|                                              | <b>3.2.c.3</b>                                     | 11.5         | 14.57                     | 43                          |
| Li <sub>4</sub> Cl <sub>2</sub> <sup>+</sup> | <b>4.2.c.1</b> ( $C_s$ , $^2A'$ )                  | 0.0          | 18.77                     | /                           |
|                                              | <b>4.2.c.2</b>                                     | 20.6         | 16.34                     | 17, 27                      |
|                                              | <b>4.2.c.3</b>                                     | 27.4         | 13.79                     | 4, 4, 20, 20                |
|                                              | <b>4.2.c.4</b>                                     | 31.1         | 13.89                     | 12, 27, 31, 34              |
|                                              | <b>4.2.c.5</b>                                     | 34.7         | 13.61                     | 14, 14, 21, 21, 41, 41      |
|                                              | <b>4.2.c.6</b>                                     | 40.1         | 16.21                     | 31                          |
|                                              | <b>4.2.c.7</b>                                     | 50.6         | 15.82                     | 39                          |
|                                              | <b>4.2.c.8</b>                                     | 63.0         | 13.50                     | 28, 31, 35, 38              |
| Li <sub>5</sub> Cl <sub>2</sub> <sup>+</sup> | <b>5.2.c.1</b> ( $C_s$ , $^1A'$ )                  | 0.0          | 23.30                     | /                           |
|                                              | <b>5.2.c.2</b>                                     | 39.4         | 18.12                     | 11, 26, 29, 32              |
|                                              | <b>5.2.c.3</b>                                     | 51.0         | 20.00                     | 25, 28                      |
|                                              | <b>5.2.c.4</b>                                     | 54.0         | 19.84                     | 36, 42                      |
|                                              | <b>5.2.c.5</b>                                     | 54.3         | 17.14                     | 4, 7, 18, 19, 41            |
|                                              | <b>5.2.c.6</b>                                     | 55.4         | 20.83                     | 23, 44, 46                  |
|                                              | <b>5.2.c.7</b>                                     | 59.2         | 19.55                     | /                           |
|                                              | <b>5.2.c.8</b>                                     | 59.6         | 19.75                     | 29, 30, 46                  |
|                                              | <b>5.2.c.9</b>                                     | 70.8         | 19.29                     | 41, 47                      |
|                                              | <b>5.2.c.10</b>                                    | 73.3         | 21.09                     | /                           |



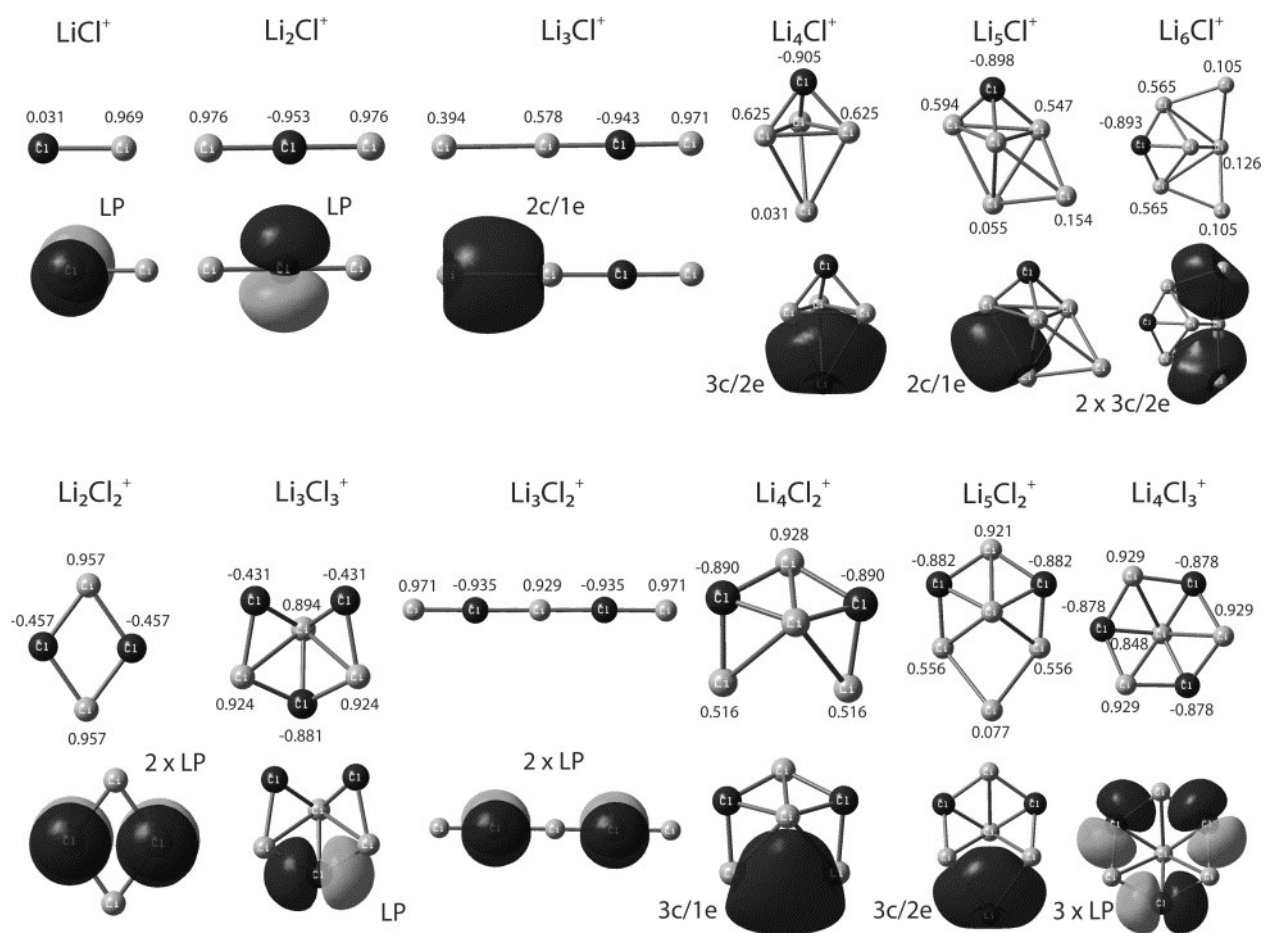

**Figure S1.** The charge distribution and the highest occupied NBO for cationic  $\text{Li}_n\text{Cl}_m$  clusters.
